# Supplementary material for: Spiro-based diamond-type nanogrids (DGs) via two ways: ‘A1B1’/‘A2 + B2’ type gridization of vertical spiro-based fluorenol synthons
Source: Royal Society of Chemistry journal article supplement (doi:10.1039/d1ob01907d), 2021-01-01
Supplement: d1ob01907d1.pdf [file d1ob01907d1.pdf]

## Supporting Information

### **Spiro-based Diamond-type nanogirds (DGs) via two ways of 'A<sub>1</sub>B<sub>1</sub>'/**

### **'A<sub>2</sub>+B<sub>2</sub>' type gridization of vertical spiro-based fluorenol synthons**

Ying Wei,<sup>†a</sup> Yang Li,<sup>†a</sup> Dongqing Lin,<sup>a</sup> Dong Jin,<sup>a</sup> Xue Du,<sup>a</sup> Chunxiao Zhong,<sup>a</sup> Ping Zhou,<sup>a</sup> Yue Sun,<sup>a</sup> Linghai Xie,<sup>\*a</sup> and Wei Huang<sup>ab</sup>

<sup>a</sup>Centre for Molecular Systems and Organic Devices (CMSOD), Key Laboratory for Organic Electronics and Information Displays & Jiangsu Key Laboratory for Biosensors, Institute of Advanced Materials (IAM), Jiangsu National Synergetic Innovation Center for Advanced Materials (SICAM), Nanjing University of Posts & Telecommunications, 9 Wenyuan Road, Nanjing 210023 (P.R. China).

<sup>b</sup>Shaanxi Institute of Flexible Electronics (SIFE), Northwestern Polytechnical University (NPU), 127 West Youyi Road, Xi'an 710072, Shaanxi, China

## Table of contents

|                                                                                               |            |
|-----------------------------------------------------------------------------------------------|------------|
| <b>1. The structure of DGs-1, DGs-2, and their stereoisomers.....</b>                         | <b>S2</b>  |
| <b>2. The theoretical calculation of DGs. ....</b>                                            | <b>S4</b>  |
| <b>3. The TLC, <sup>1</sup>H NMR and MALDI-TOF-MS spectrum of DGs' reaction mixtures.....</b> | <b>S5</b>  |
| <b>4. The GPC spectrum.....</b>                                                               | <b>S8</b>  |
| <b>5. The <sup>1</sup>H NMR spectra of the DGs and DGs' stereoisomers.....</b>                | <b>S9</b>  |
| <b>6. <sup>1</sup>H and <sup>13</sup>C NMR spectra of compounds .....</b>                     | <b>S11</b> |
| <b>7. MALDI-TOF-MS of compounds .....</b>                                                     | <b>S21</b> |

# 1. The structure of DGs-1, DGs-2, and their stereoisomers.

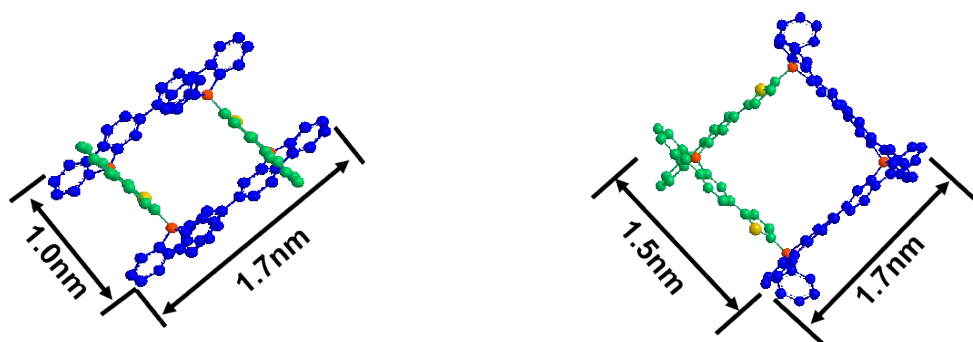

Diamond-type grids-1 (DGs-1)

Diamond-type grids-2 (DGs-2)

Fig. S1 Two Diamond-type nanogirds' theoretical size, the substituents and hydrogen atoms are omitted.

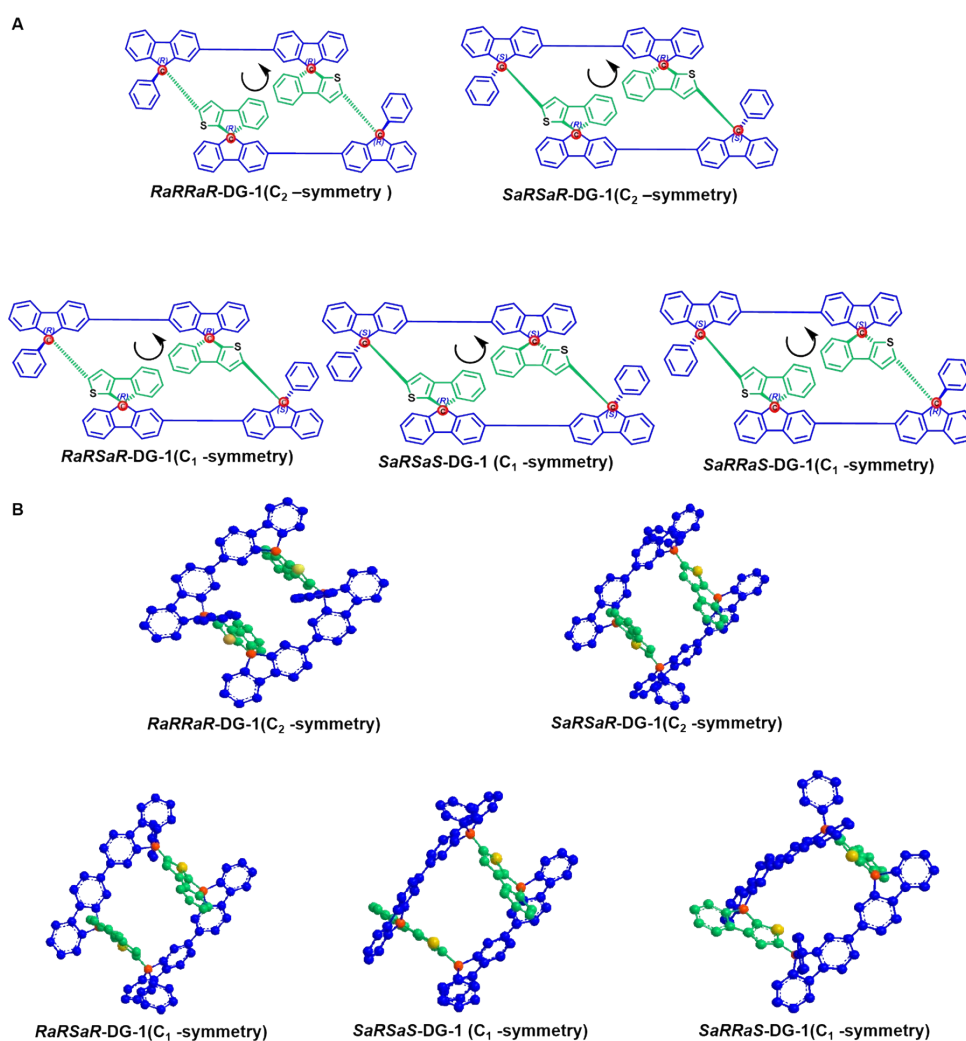

Fig. S2 The stereoisomers of DGs-1, the substituents and hydrogen atoms are

omitted. (A) displayed formula; (B) stereostructural formula.

A

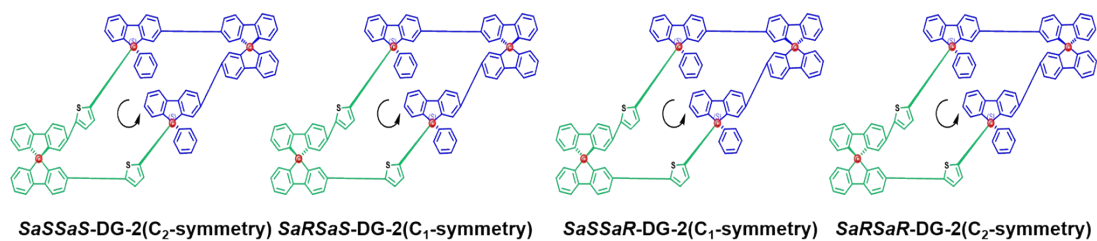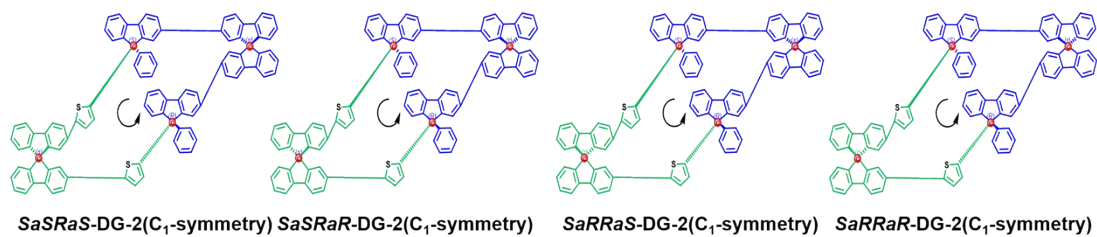

B

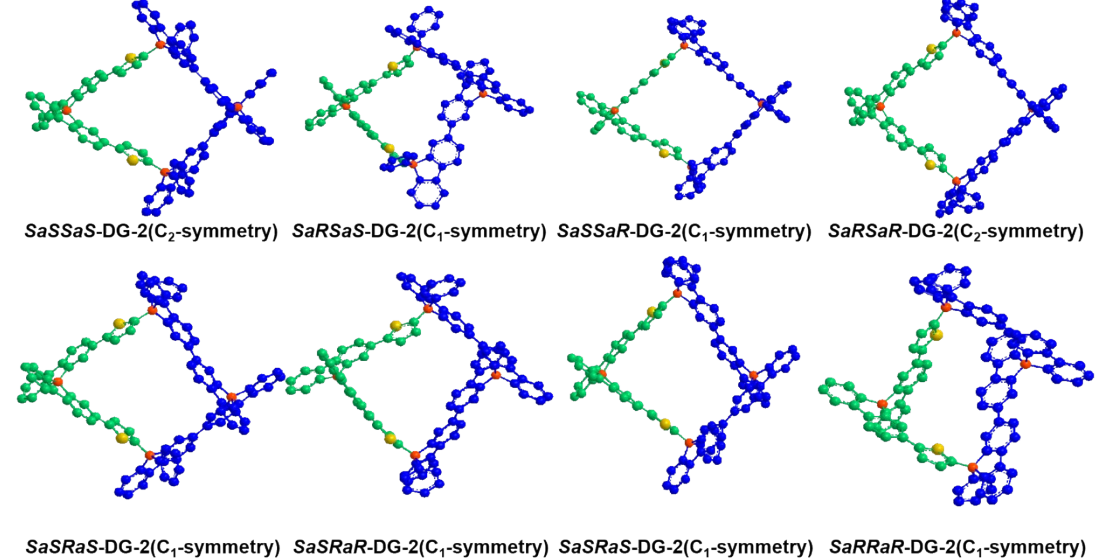

Fig. S3 The stereoisomers of DGs-2, the substituents and hydrogen atoms are omitted. (A) displayed formula; (B) stereostructural formula.

## 2. The theoretical calculation of DGs.

The strain energier of DGs-1 and DGs-2 were carried out by a homodesmotic reaction (Fig. S4) and the DFT calculation at the B3LYP/6-31G(d) level, and the results showing in Fig. S5, which indicate the easy synthesis of DGs-2.

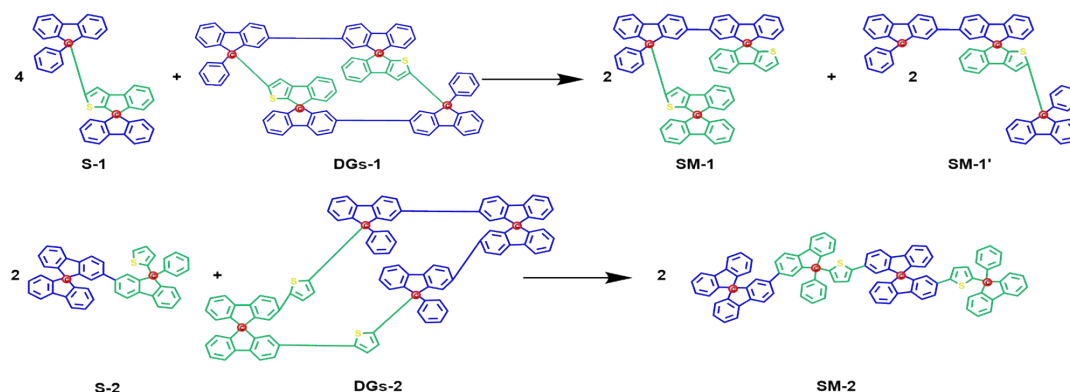

Fig. S4 The homodesmotic reactions of DGs-1 and DGs-2.

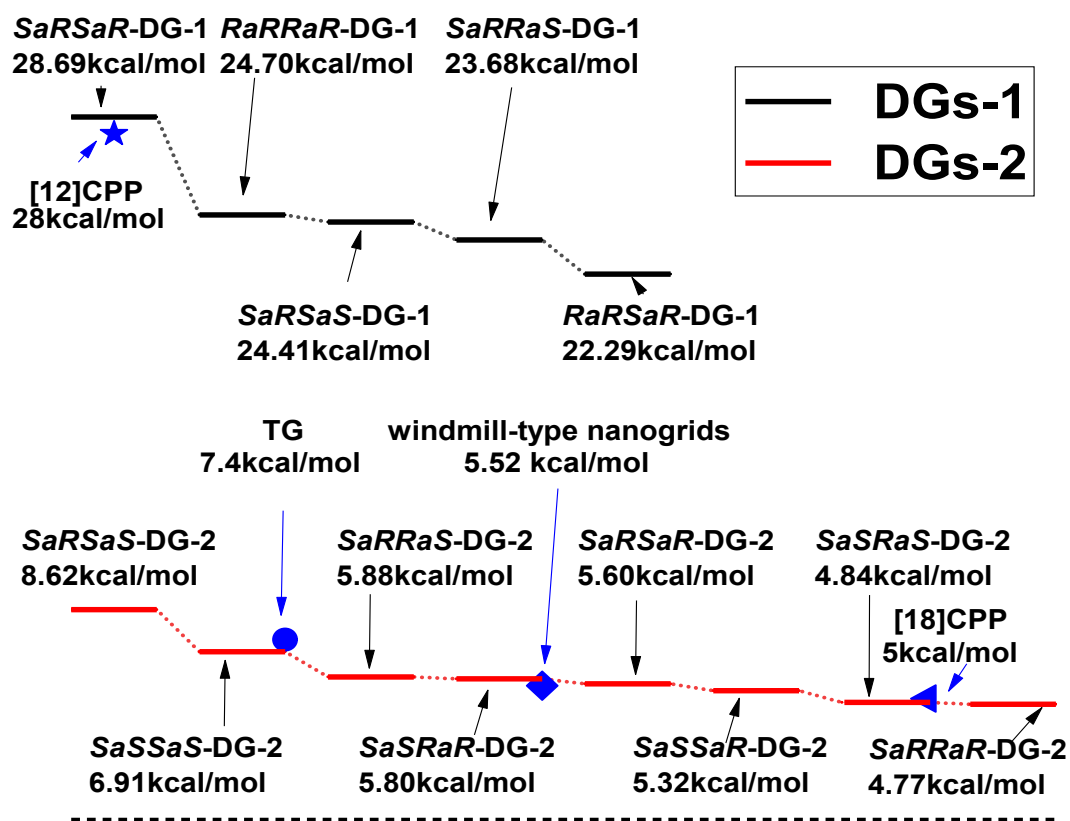

Fig. S5 The strain energies of DGs-1 and DGs-2.

### 3. The TLC, $^1\text{H}$ NMR and MALDI-TOF-MS spectrum of DGs' reaction mixtures.

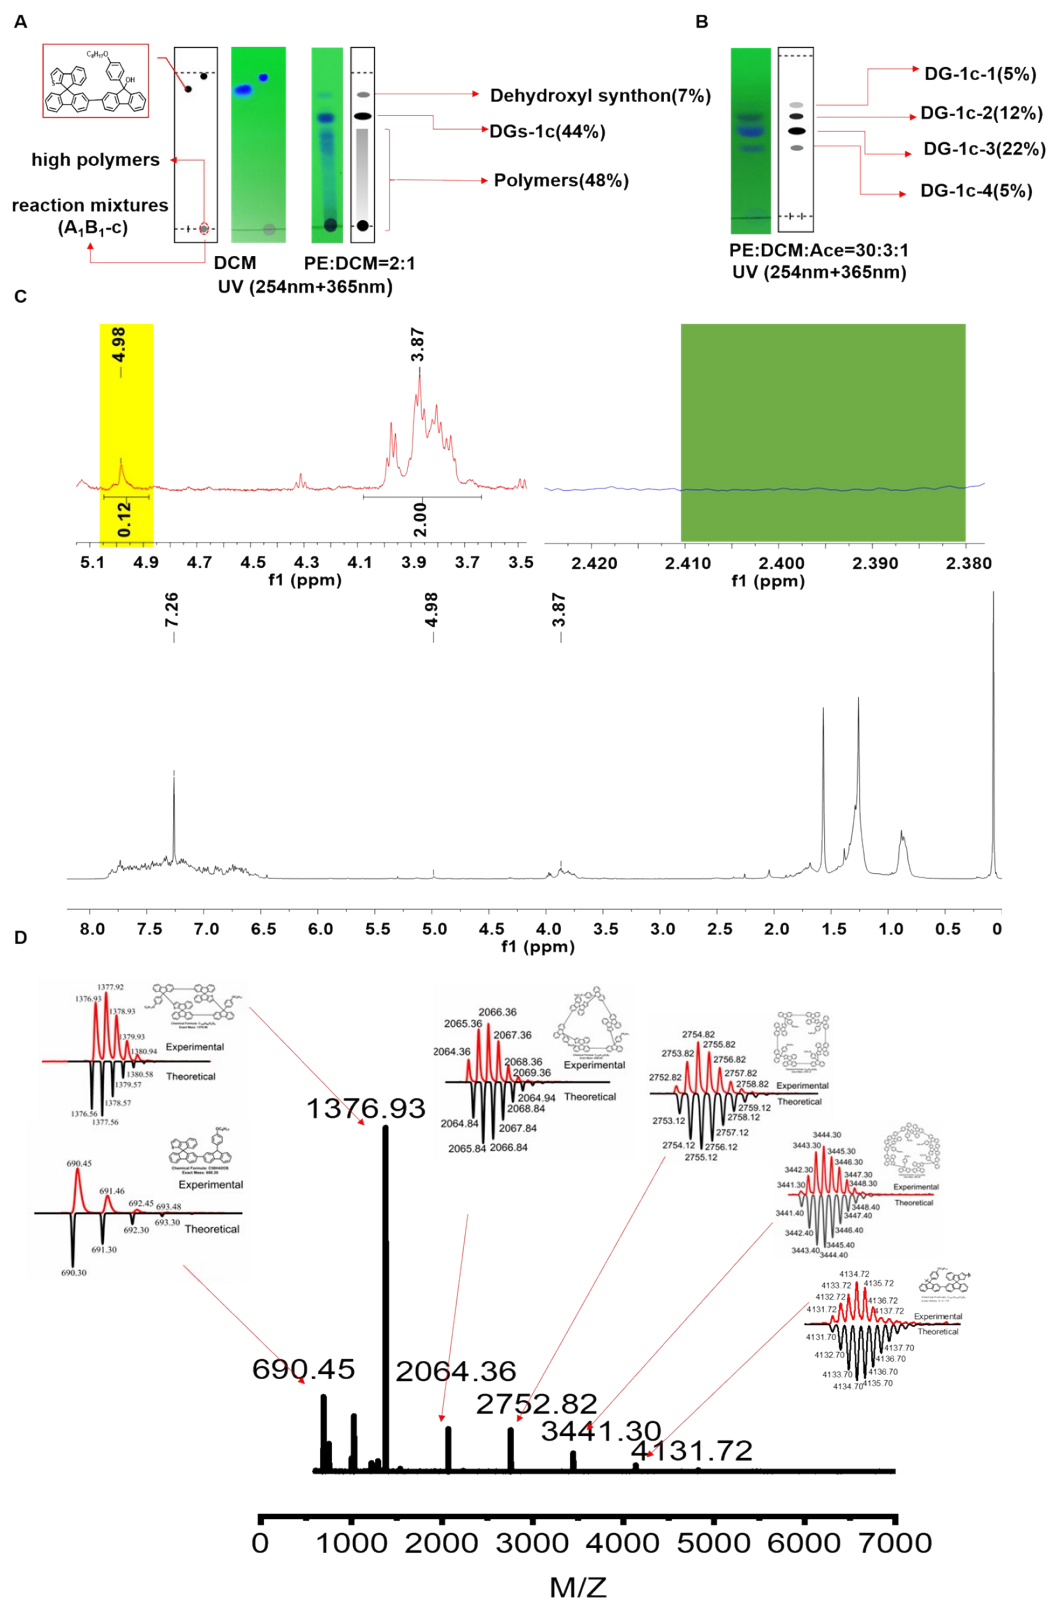

Fig. S6 (A) Photograph of the TLC chromatograms of the reaction mixtures of  $A_1B_1-c$

under a UV lamp with irradiation wavelengths of 254 nm + 365 nm, the developing solvent is DCM (the  $A_1B_1$  have completely reacted, consistent with a total yield of 98% and high polymers were found) or PE:DCM=3:1; (B) Photograph of the TLC chromatograms of the stereoisomers of DGs-1c; (C) The  $^1H$  NMR (400MHz,  $CDCl_3$ ) of reaction mixtures in  $A_1B_1$ -c, no significant OH absorption peak was observed during 2.38-2.41ppm (light green area) to indicate the  $A_1B_1$ -c has completely reacted, consistent with a total yield of 98%, the integral value is 0.12 ( $0.12 > 0.07$ ) during 4.90-5.00ppm (yellow area) to indicate linear polymers; (D) The MALDI-TOF-MS spectrum of  $A_1B_1$ -c reaction mixtures, the byproducts, including dehydroxyl synthon and oligomers (the trimer grid, tetramer grid, pentamer grid and linear hexamer).

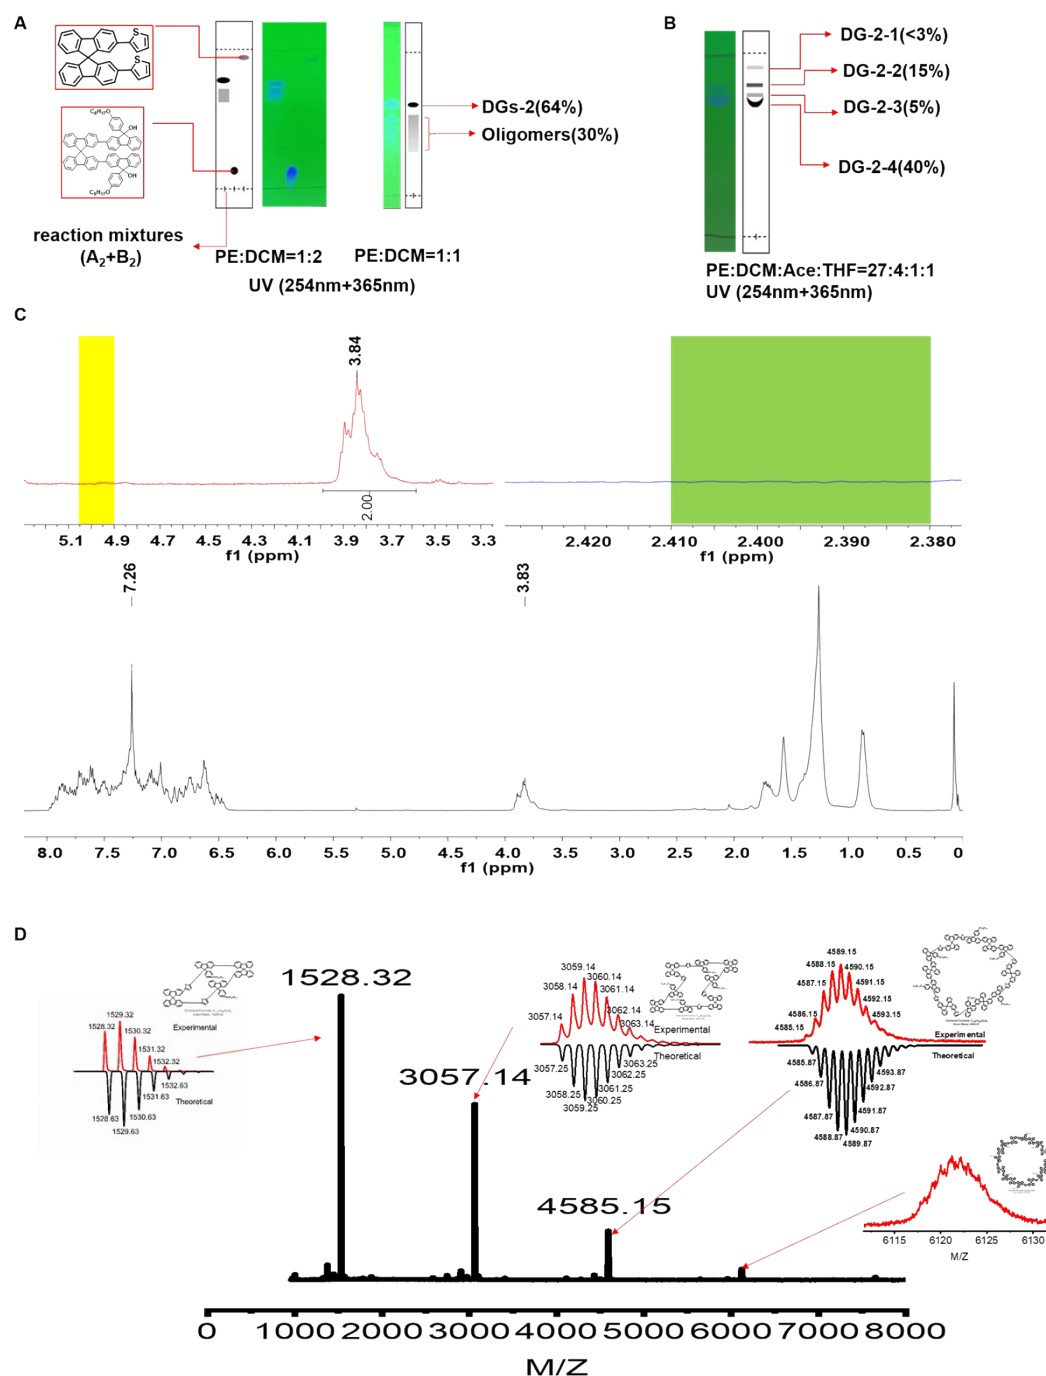

Fig. S7 (A) Photograph of the TLC chromatograms of the reaction mixtures of  $A_2+B_2$  under a UV lamp with irradiation wavelengths of 254 nm + 365 nm, the developing solvent is PE:DCM=1:2 (the  $A_2+B_2$  have completely reacted, consistent with a total yield of 94% and no high polymers were found) or 1:1; (B) Photograph of the TLC chromatograms of the stereoisomers of DGs-2; (C) The  $^1H$  NMR (400MHz,  $CDCl_3$ ) of reaction mixtures in  $A_2+B_2$ , no significant OH absorption peak was observed during 2.38-2.41ppm (light green area) to indicate the  $A_2$  has completely reacted and no

significant absorption during 4.90-5.00ppm (yellow area) to indicate linear polymers without A<sub>2</sub> closure; (D) The MALDI-TOF-MS spectrum of A<sub>2</sub>+B<sub>2</sub> reaction mixtures, the byproducts, oligomers (the dimeric grid, trimer grid, tetramer grid).

#### 4. The GPC spectrum.

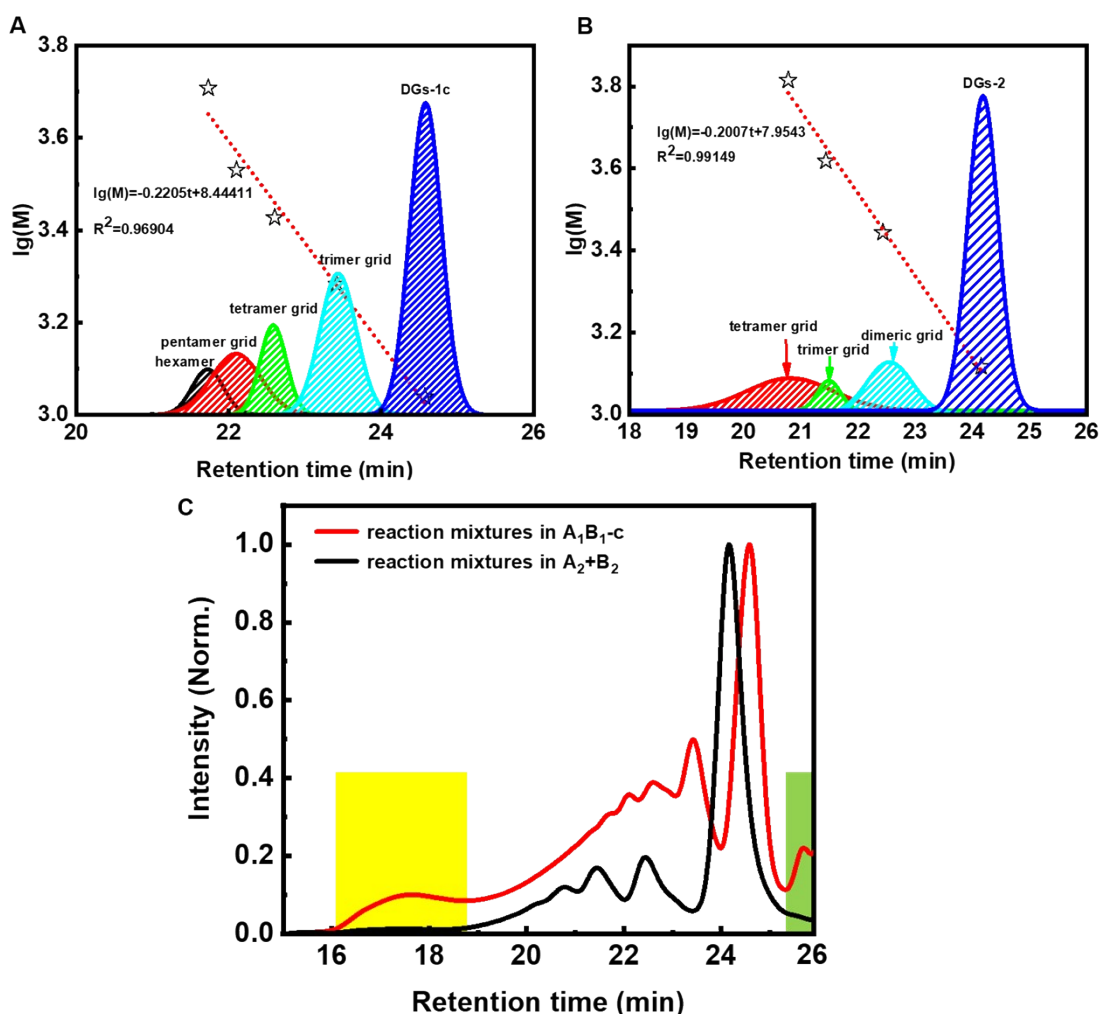

Fig. S8 (A) The calibration of DGs-1c and polymers (The blue, sky-blue, green, red, and black peaks correspond to DGs-1c, trimer, tetramer, pentamer, and hexamer, respectively, in which the star dots exhibit their individual logarithmic molecular mass  $\lg M$  and retention time  $t$ ), the coefficient of determination  $R^2$  is 0.96904 ( $<0.99$ ), indicates that the structure of all polymers is not consistent, hexamer is linear (Judge by the degree of deviation from the linear fitting function, consistent with Fig.S6D). (B)The calibration of reaction mixtures in A<sub>2</sub>+B<sub>2</sub> (The blue, sky-blue, green, and red peaks correspond to DGs-2, dimer, trimer, tetramer, respectively, in



which the star dots exhibit their individual logarithmic molecular mass  $\lg M$  and retention time  $t$ ), the coefficient of determination  $R^2$  is 0.99149 ( $>0.99$ ), indicates that the structure of all products is consistent, that is, all are nonlinear. (C) The GPC spectrum of reaction mixtures in  $A_1B_1$ -c and  $A_2+B_2$ , high polymers (yellow area) and dehydroxyl synthon (green area) were found in  $A_1B_1$ -c (consistented with Fig.S6A and S7A).

## 5. The $^1\text{H}$ NMR spectra of the DGs and DGs' stereoisomers.

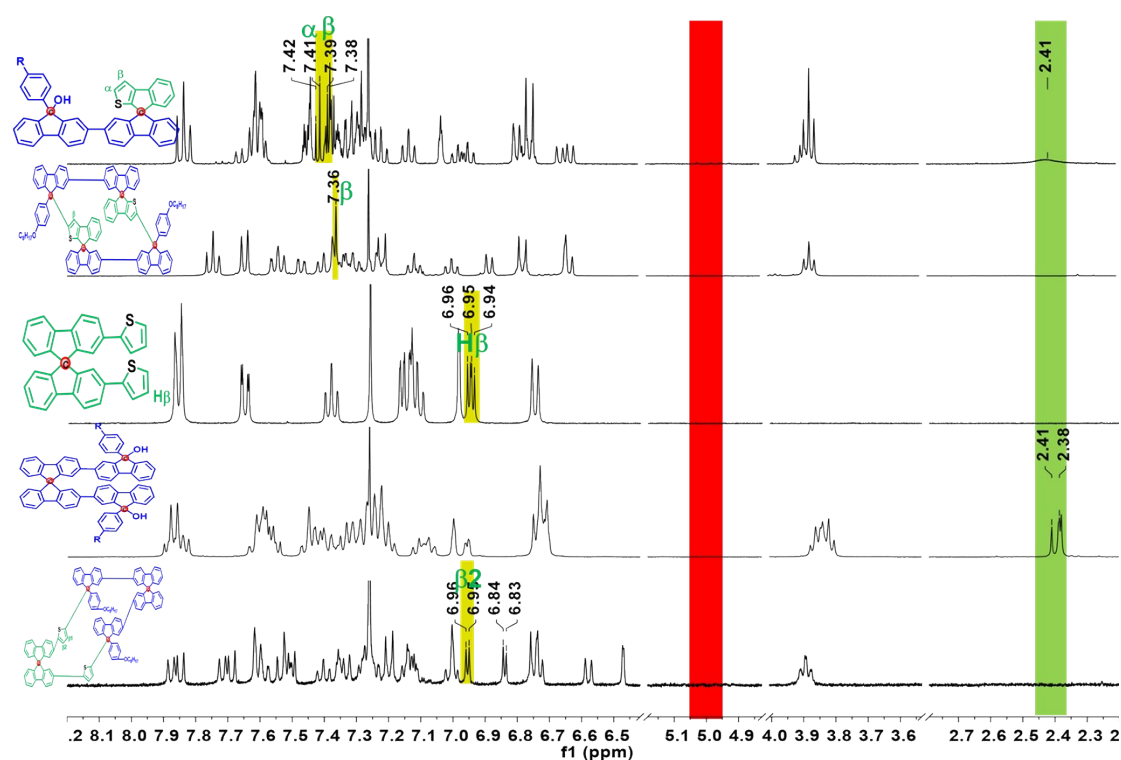

Fig. S9 The  $^1\text{H}$  NMR spectra (400MHz,  $\text{CDCl}_3$ ) of  $A_1B_1$  shaped synthon, DGs-1c,  $B_2$  shaped synthon,  $A_2$  shaped synthon, and DGs-2. The characteristic peaks of hydroxyl groups at 2.41-2.38 ppm disappear and the peak of hydrogen proton (4.90-5.00 ppm) at the 9 position of fluorene was not observed, and the changes protons on

thiophene, which clearly demonstrated the formation of grids.

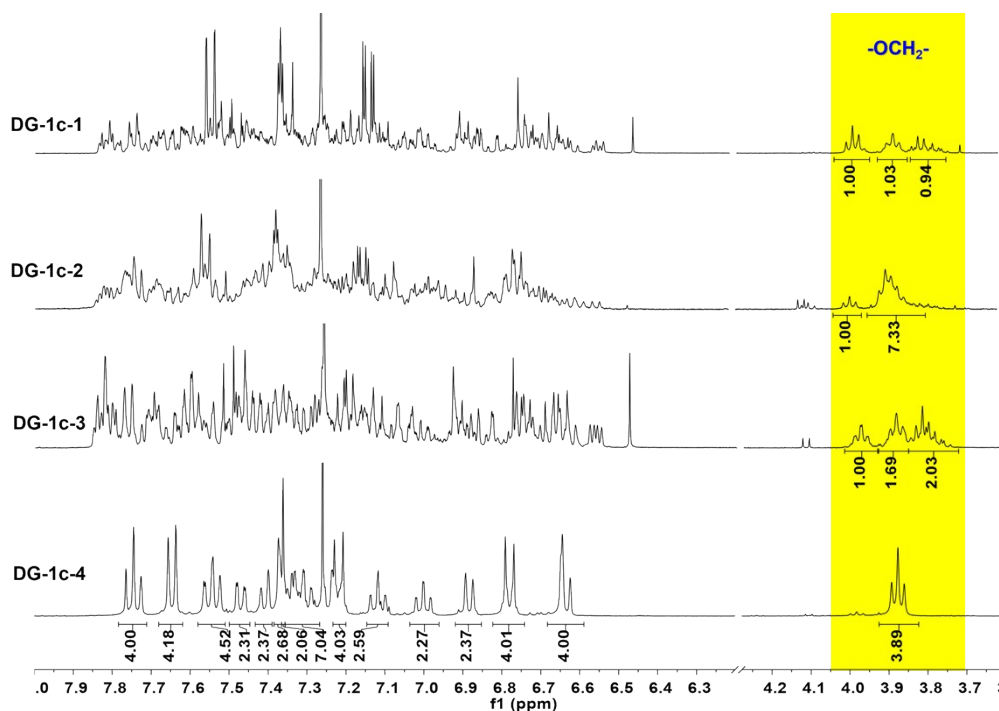

Fig. S10 The  $^1\text{H}$  NMR spectrums (400MHz,  $\text{CDCl}_3$ ) of DGs-1c, the sets of peaks or the ratio of hydrogens in 3.75-4.05 ppm ( $-\text{OCH}_2-$ , the yellow area) showed DG-1c-1, DG-1c-2 and DG-1c-3 were mixture.

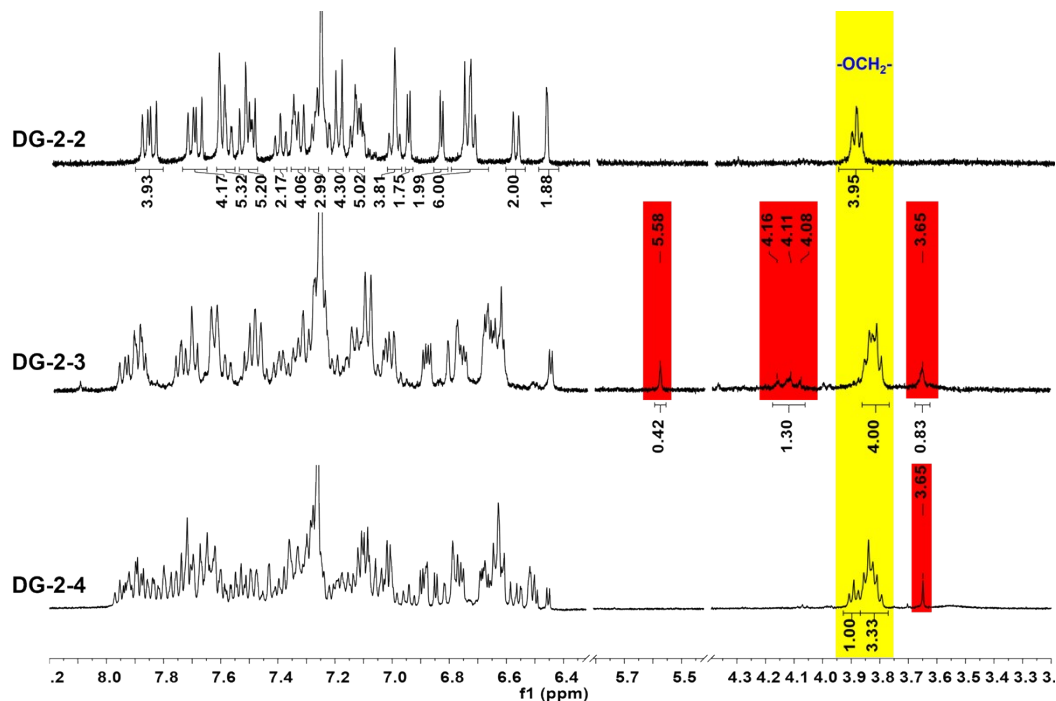

Fig. S11 The  $^1\text{H}$  NMR spectrums (400MHz,  $\text{CDCl}_3$ ) of **DG-2-2, DG-2-3 and DG-2-4**. 4.08-4.16 ppm (1.3H, the red area), 3.65 ppm (0.8H, the red area) both proved that DG-2-

3 was a mixture. The ratio of hydrogens (1:3.33) in 3.75-3.95 ppm (OCH<sub>2</sub>, the yellow area) revealed DG-2-4 was a mixture, too.

## 6. <sup>1</sup>H and <sup>13</sup>C NMR spectra of the compounds

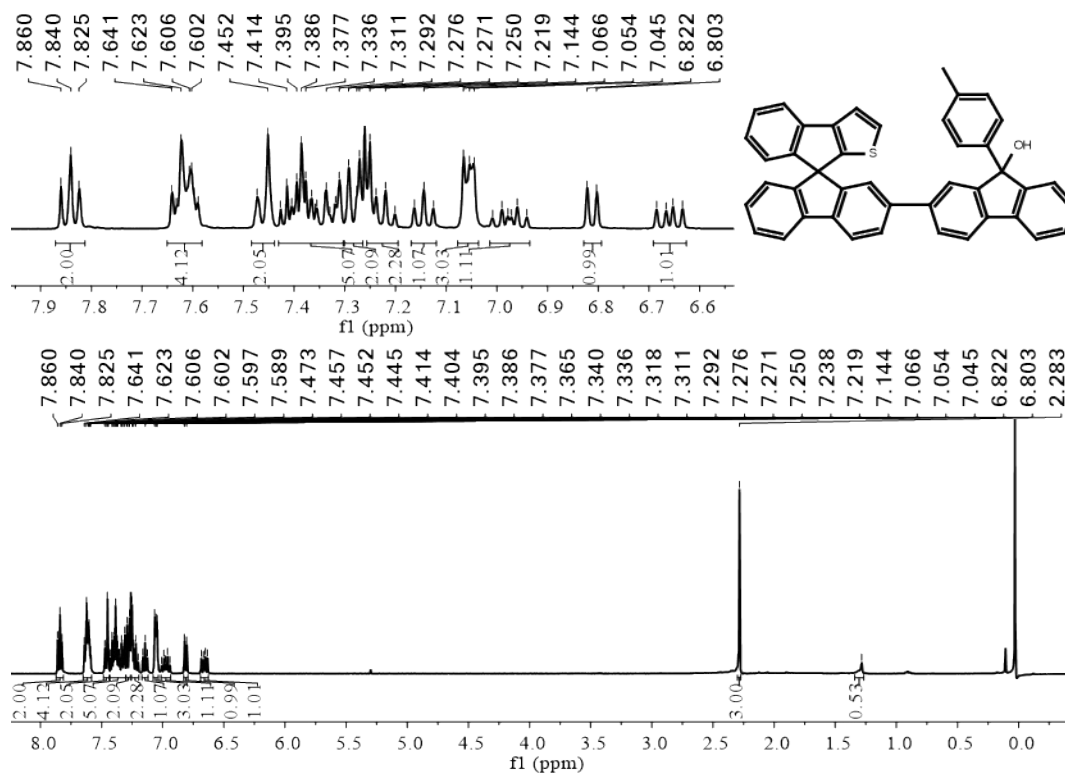

Fig. S12 <sup>1</sup>H NMR (400MHz, CDCl<sub>3</sub>) spectrum of A<sub>1</sub>B<sub>1</sub>-a.

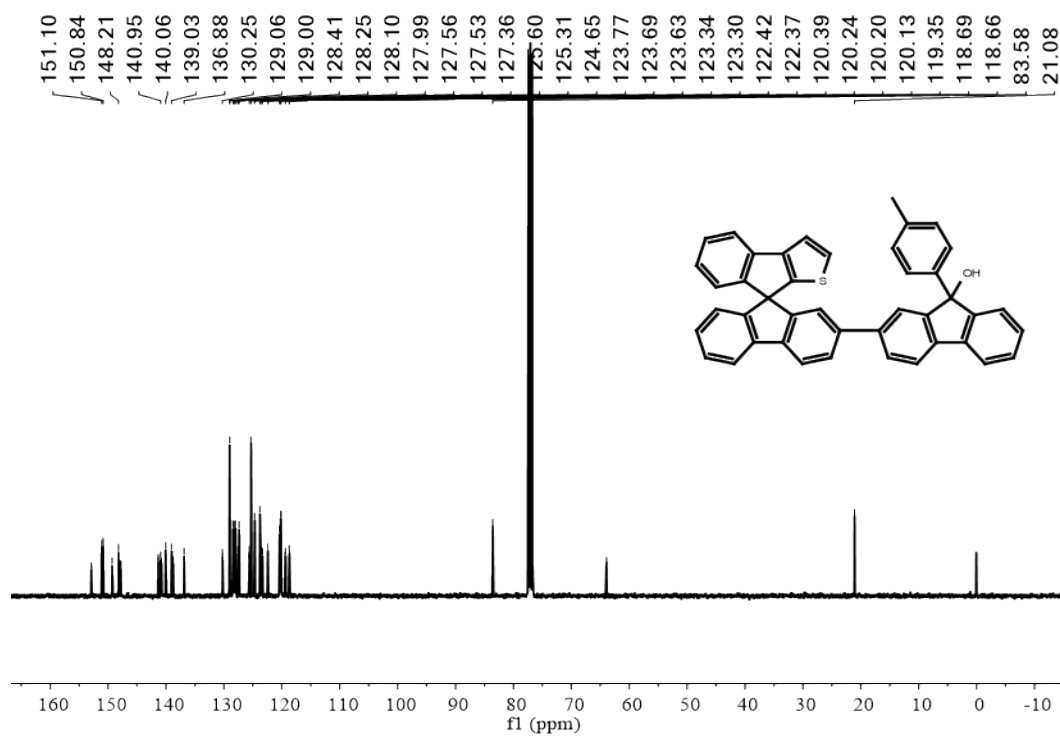

Fig. S13 <sup>13</sup>C NMR (100MHz, CDCl<sub>3</sub>) spectrum of A<sub>1</sub>B<sub>1</sub>-a.

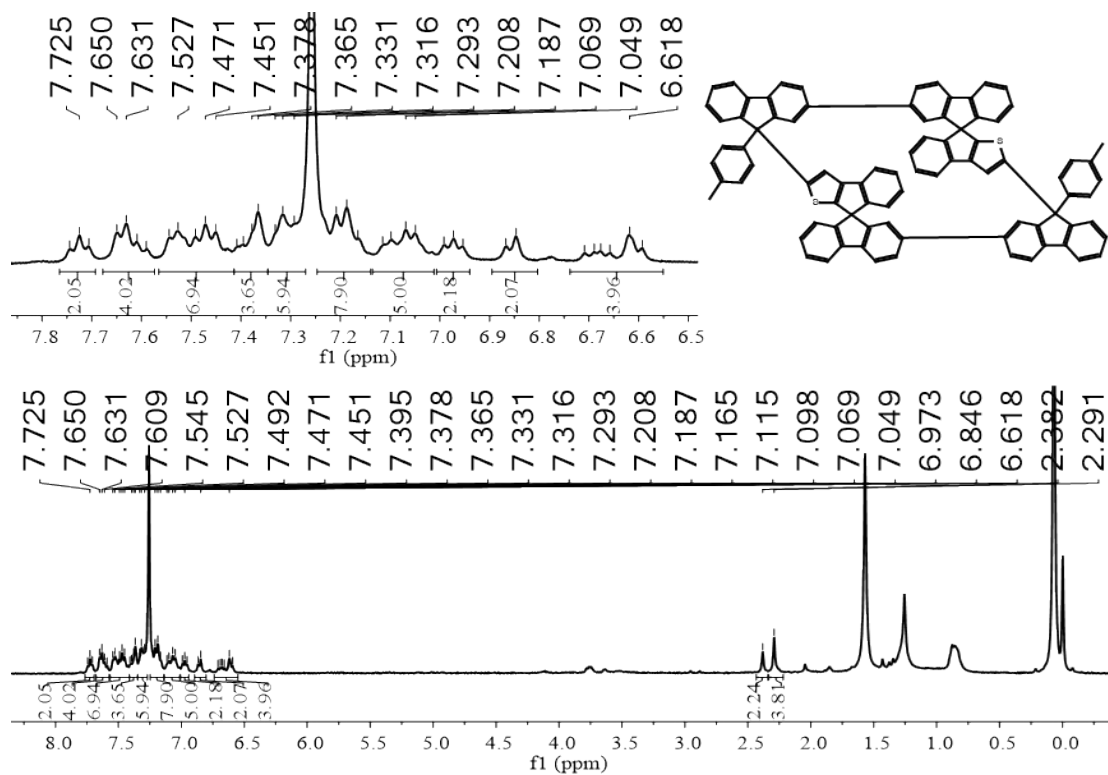

Fig. S14 <sup>1</sup>H NMR (400MHz, CDCl<sub>3</sub>) spectrum of DGs-1a.

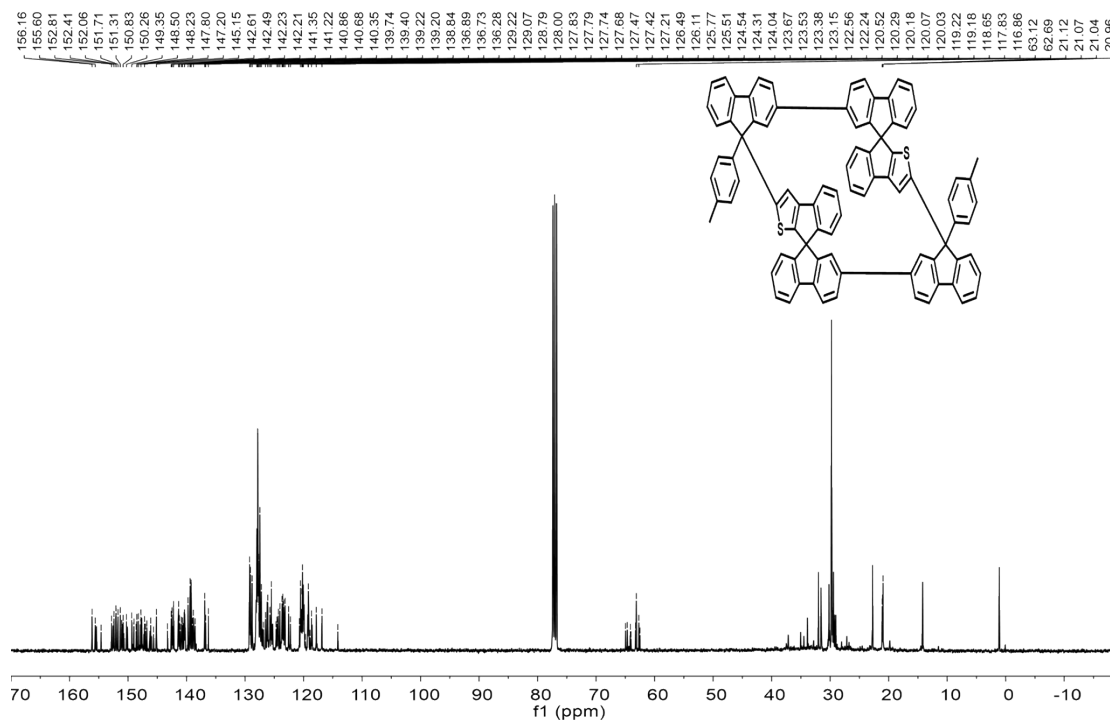

Fig.15 <sup>13</sup>C NMR (100MHz, CDCl<sub>3</sub>) spectrum of DGs-1a.

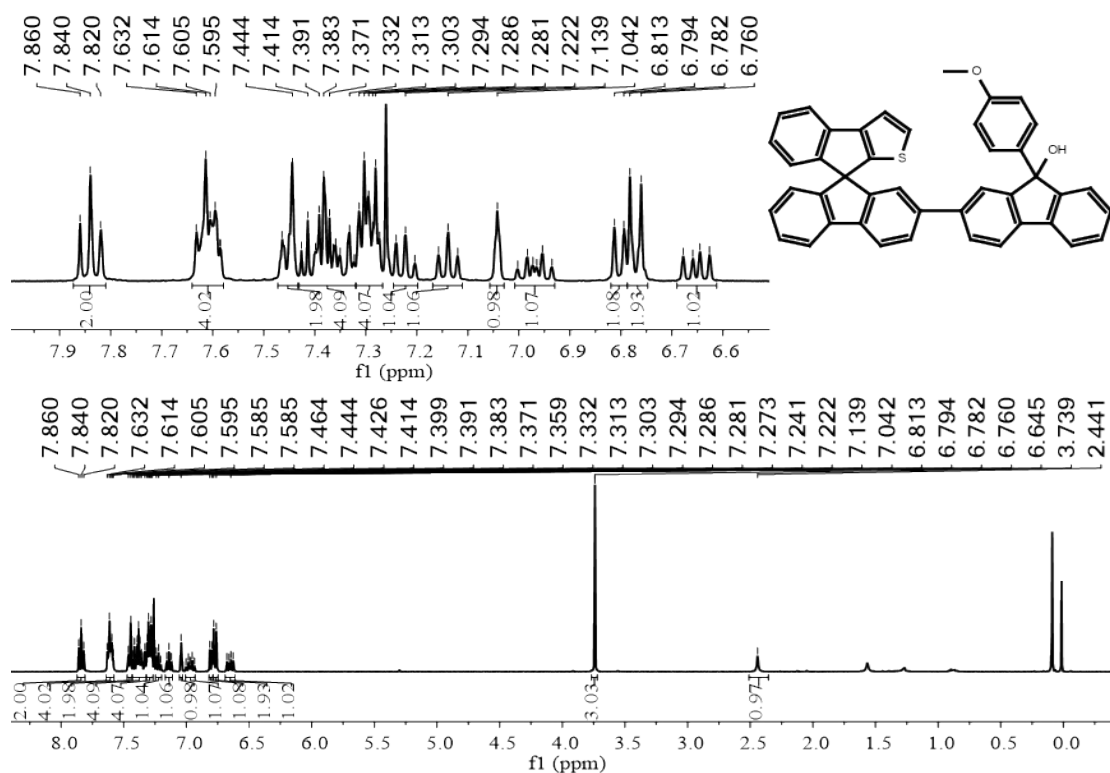

Fig. S16 <sup>1</sup>H NMR (400MHz, CDCl<sub>3</sub>) spectrum of A<sub>1</sub>B<sub>1</sub>-b.

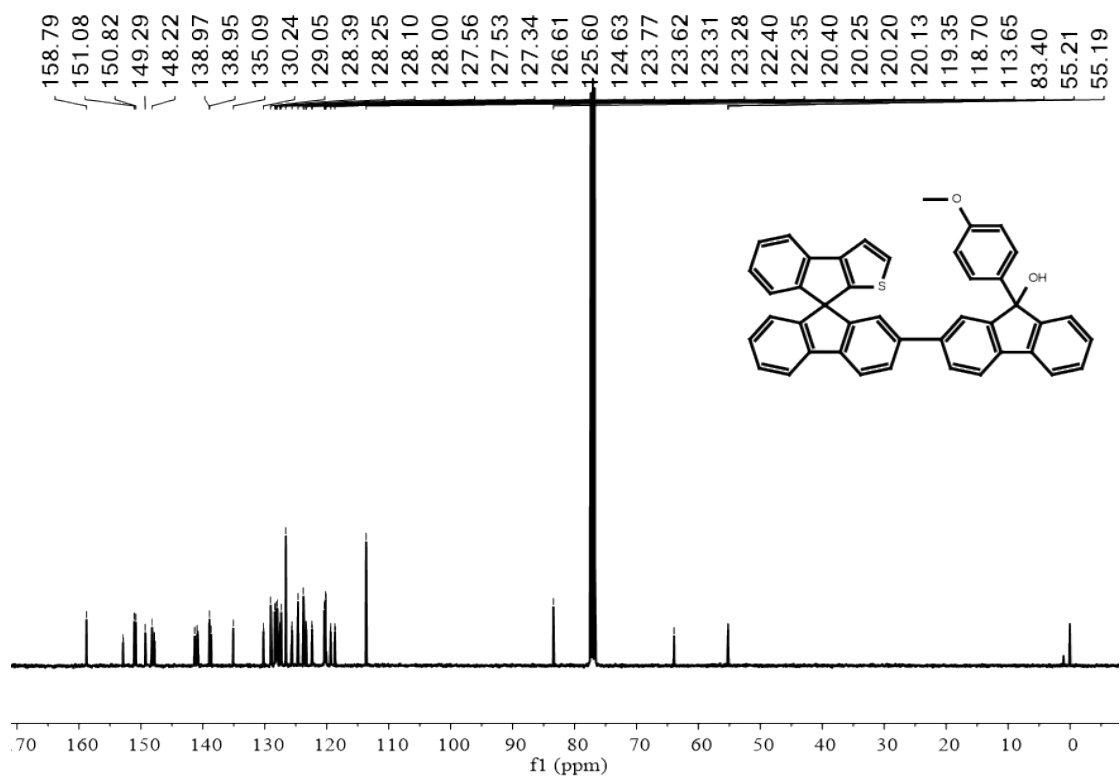

Fig. S17 <sup>13</sup>C NMR (100MHz, CDCl<sub>3</sub>) spectrum of A<sub>1</sub>B<sub>1</sub>-b.

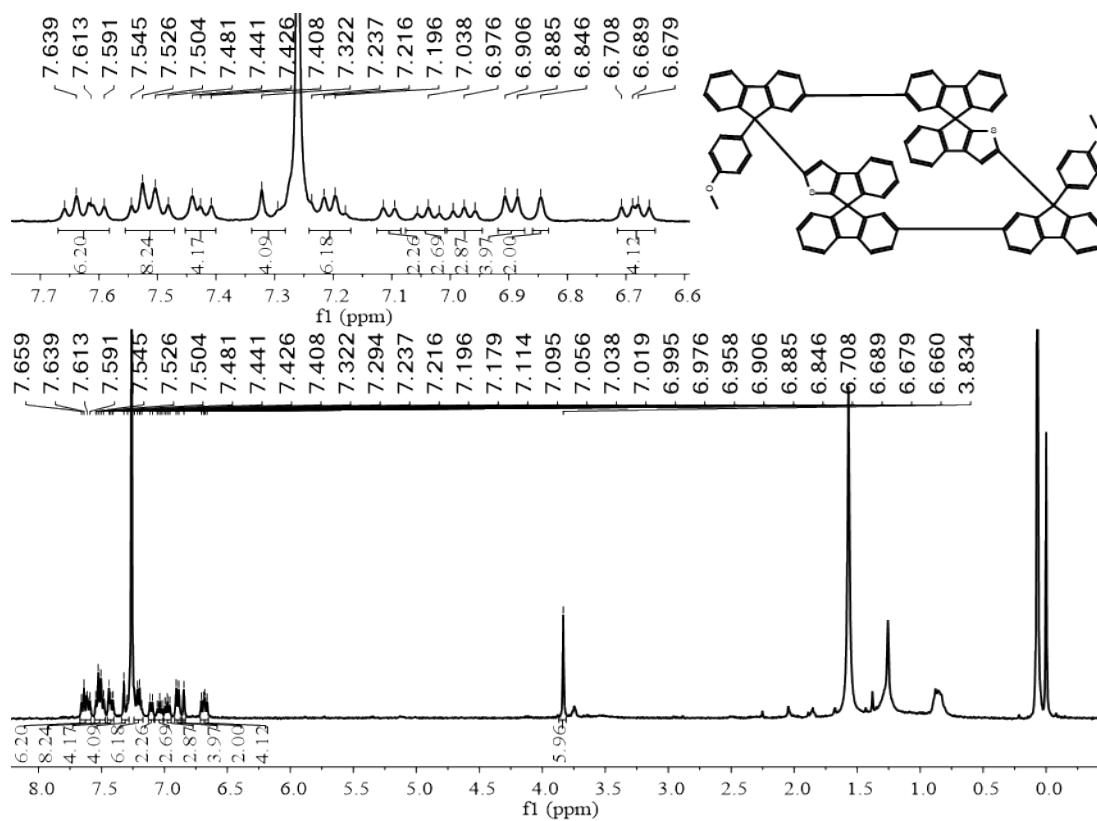

Fig. S18 <sup>1</sup>H NMR (400MHz, CDCl<sub>3</sub>) spectrum of DGs-1b.

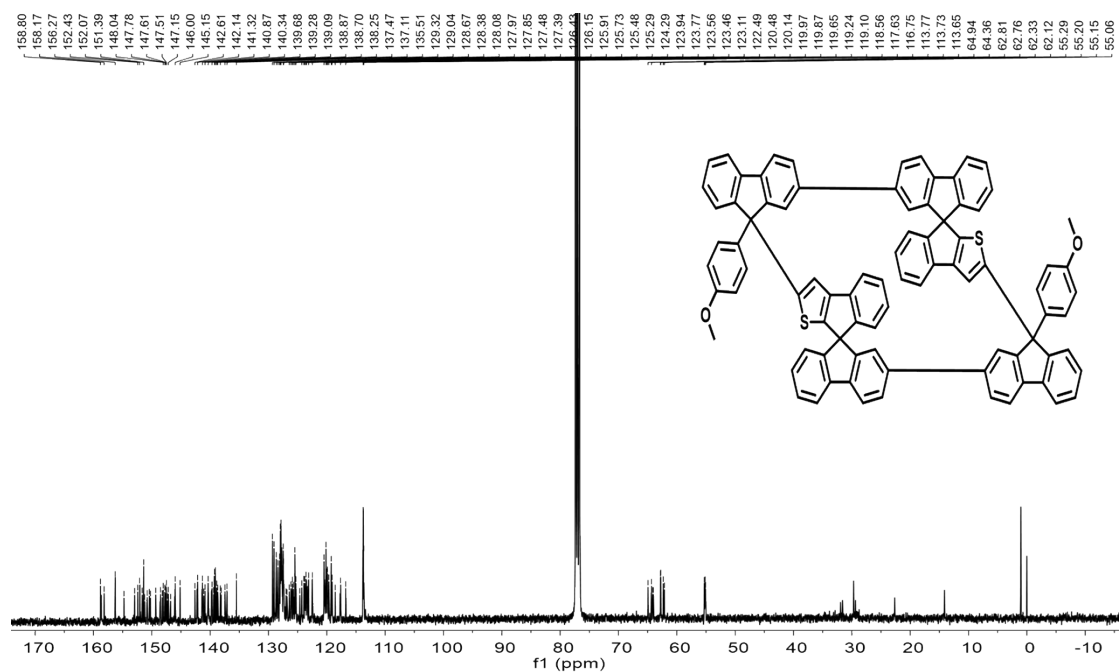

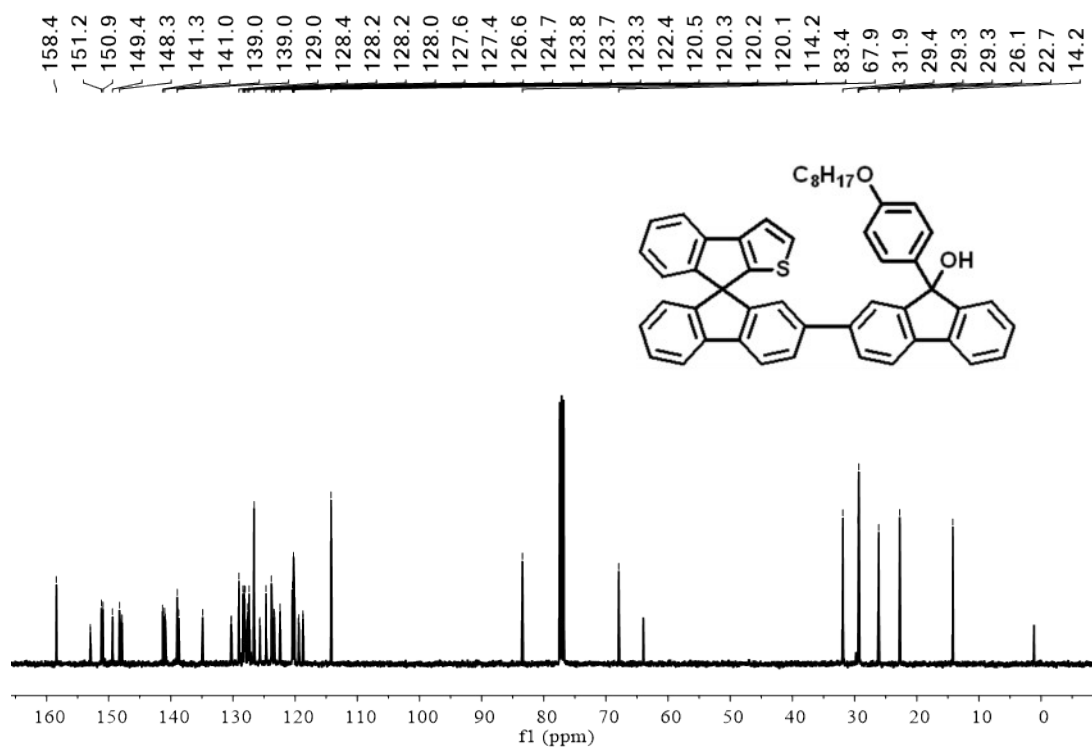

Fig. S21 <sup>13</sup>C NMR (100MHz, CDCl<sub>3</sub>) spectrum of A<sub>1</sub>B<sub>1</sub>-c.

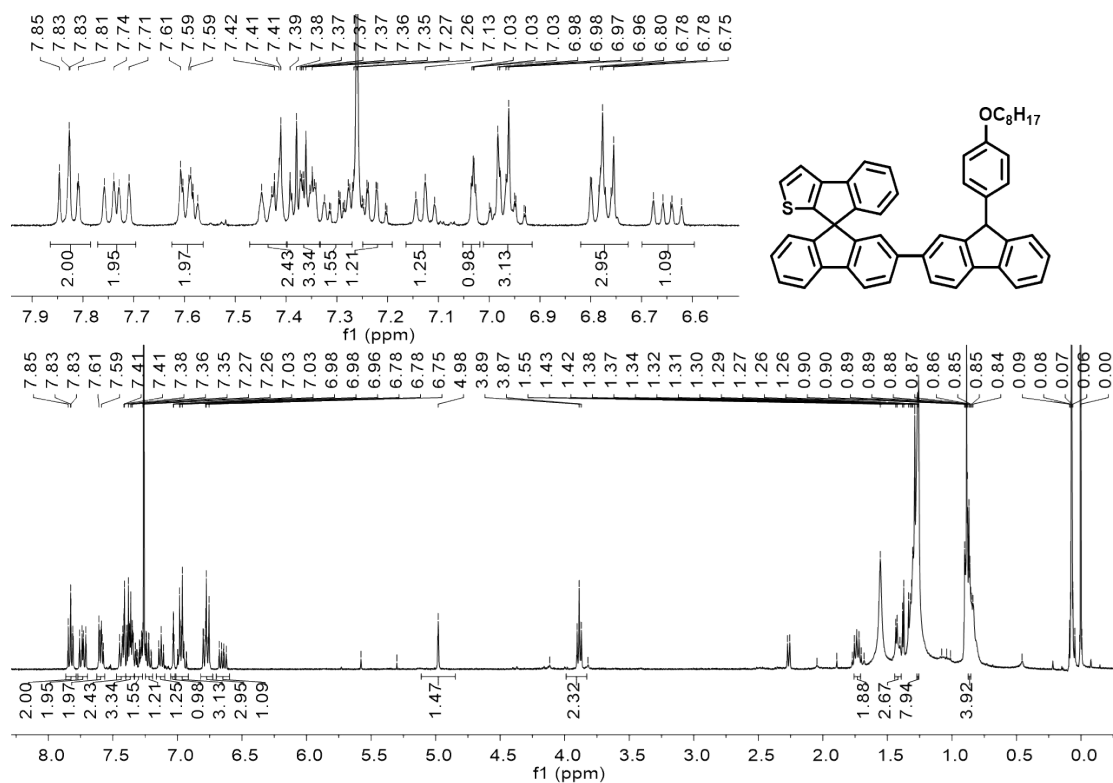

Fig. S22 <sup>1</sup>H NMR (400MHz, CDCl<sub>3</sub>) spectrum of Ds-1c.



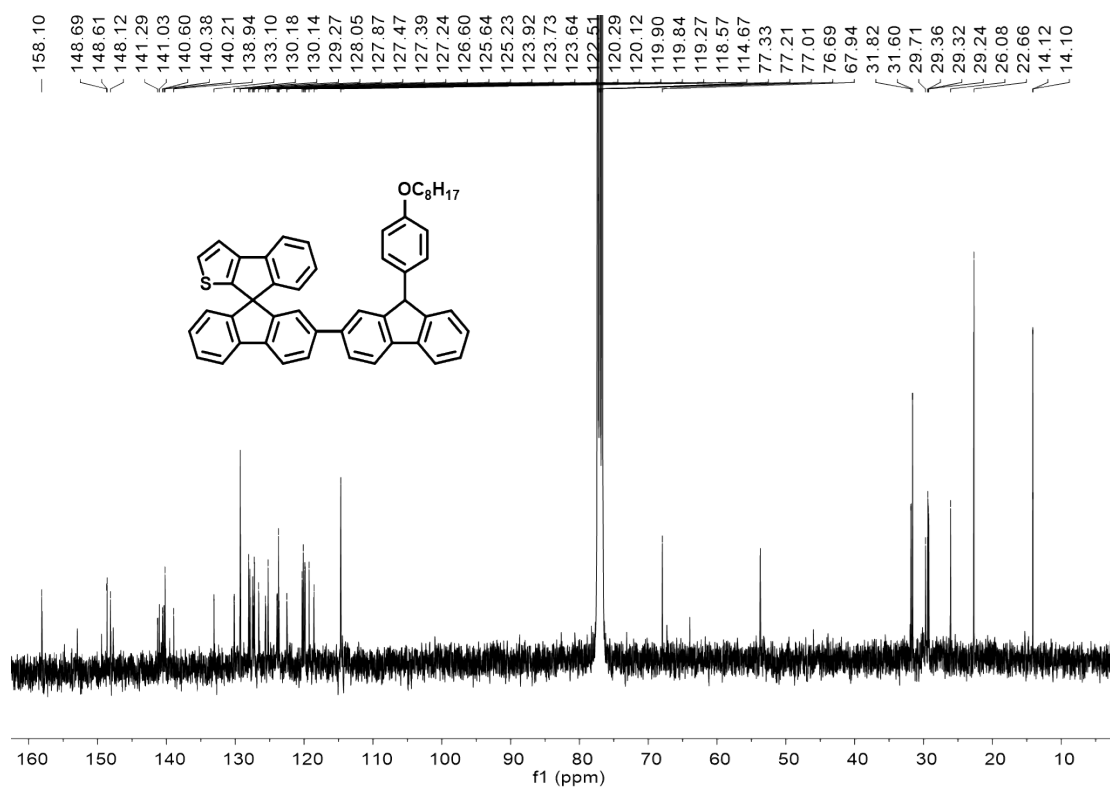

Fig. S23 <sup>13</sup>C NMR (100MHz, CDCl<sub>3</sub>) spectrum of Ds-1c.

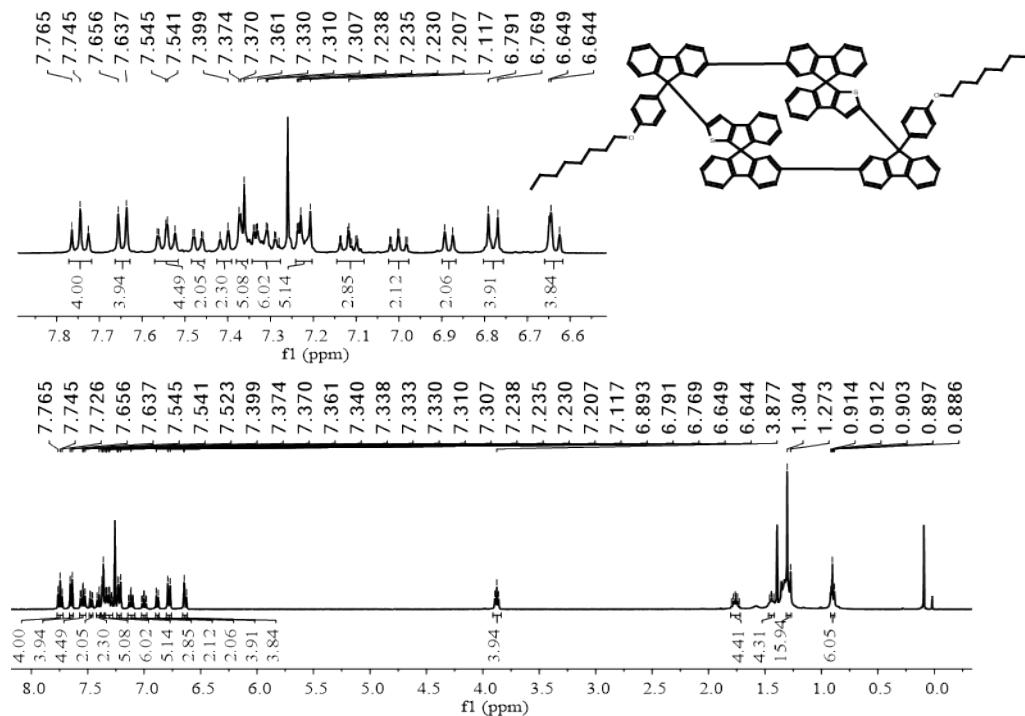

Fig. S24 <sup>1</sup>H NMR (400MHz, CDCl<sub>3</sub>) spectrum of DGs-1c.

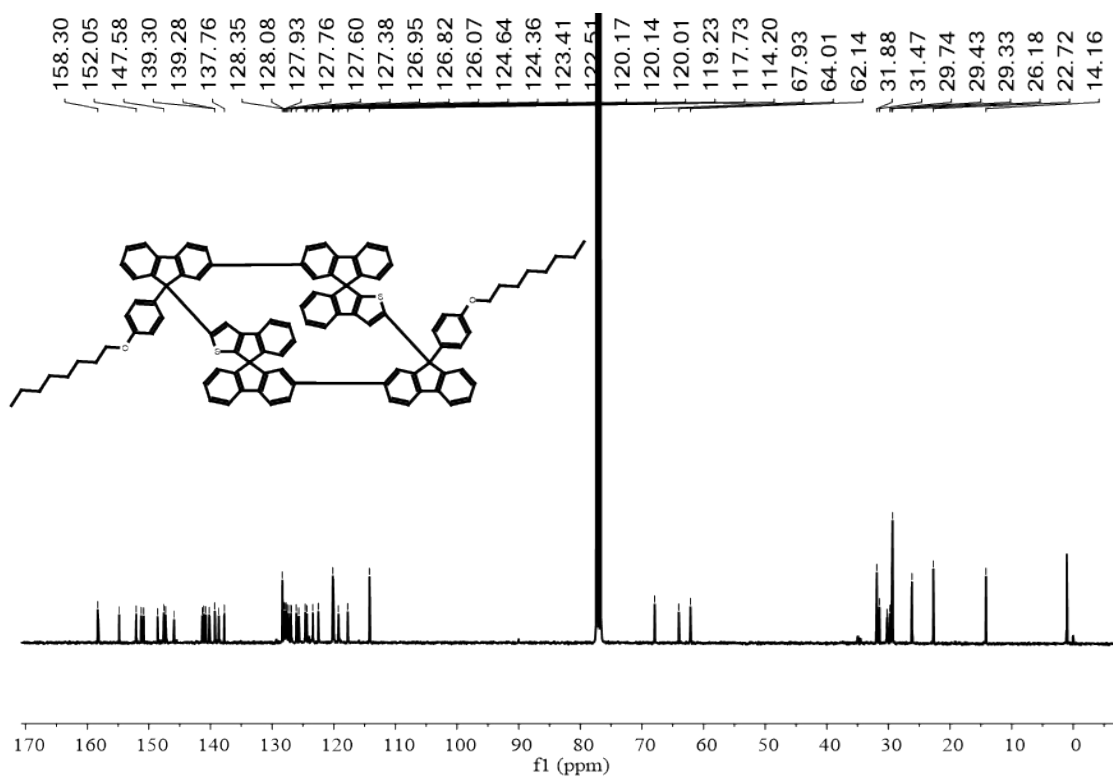

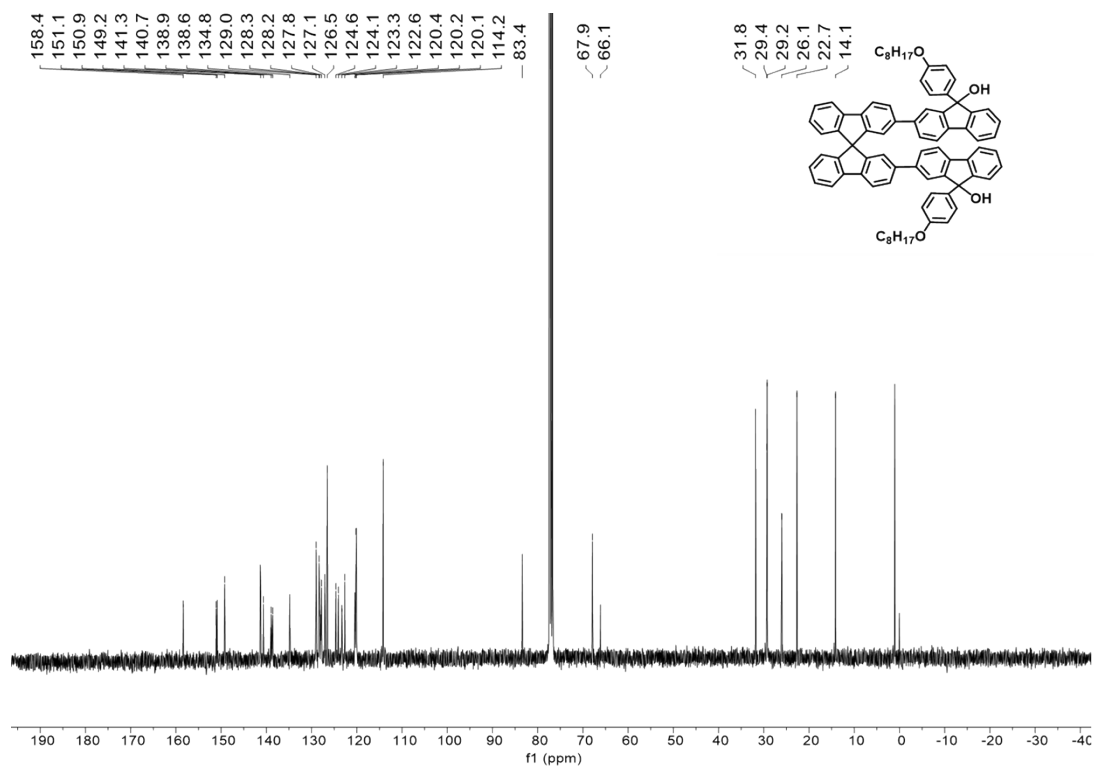

Fig. S27 <sup>13</sup>C NMR (100MHz, CDCl<sub>3</sub>) spectrum of **A<sub>2</sub>**.

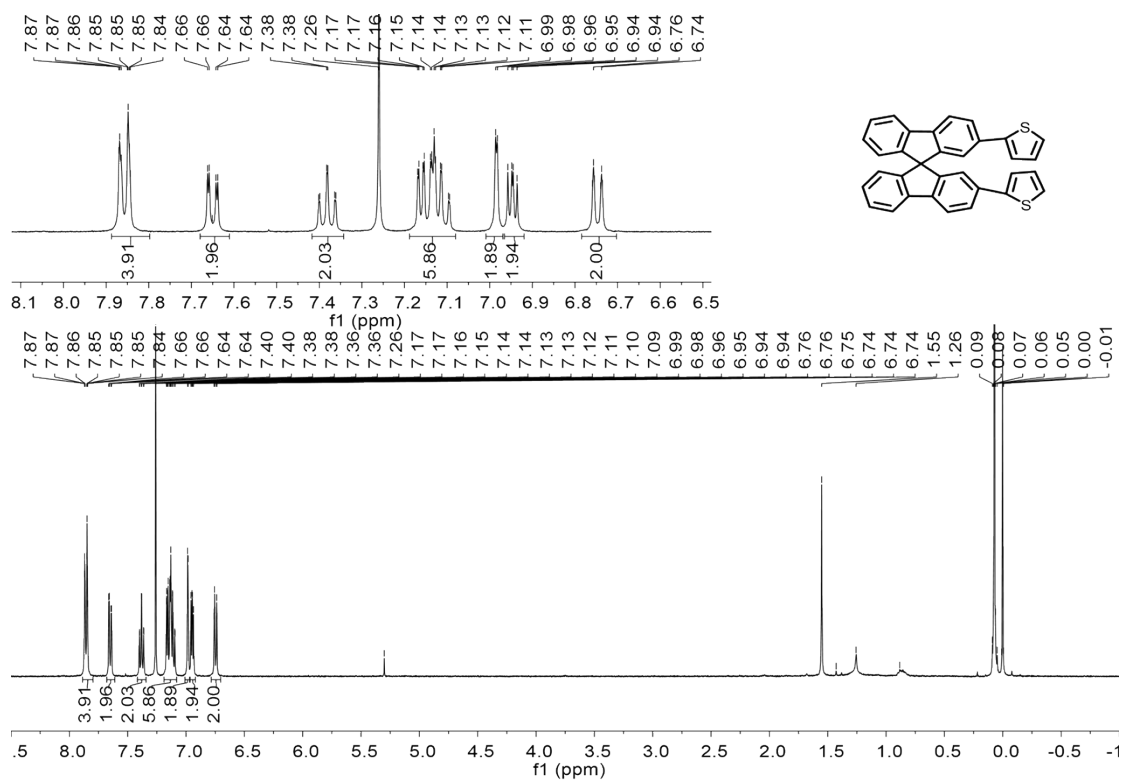

Fig. S28 <sup>1</sup>H NMR (400MHz, CDCl<sub>3</sub>) spectrum of **B<sub>2</sub>**.

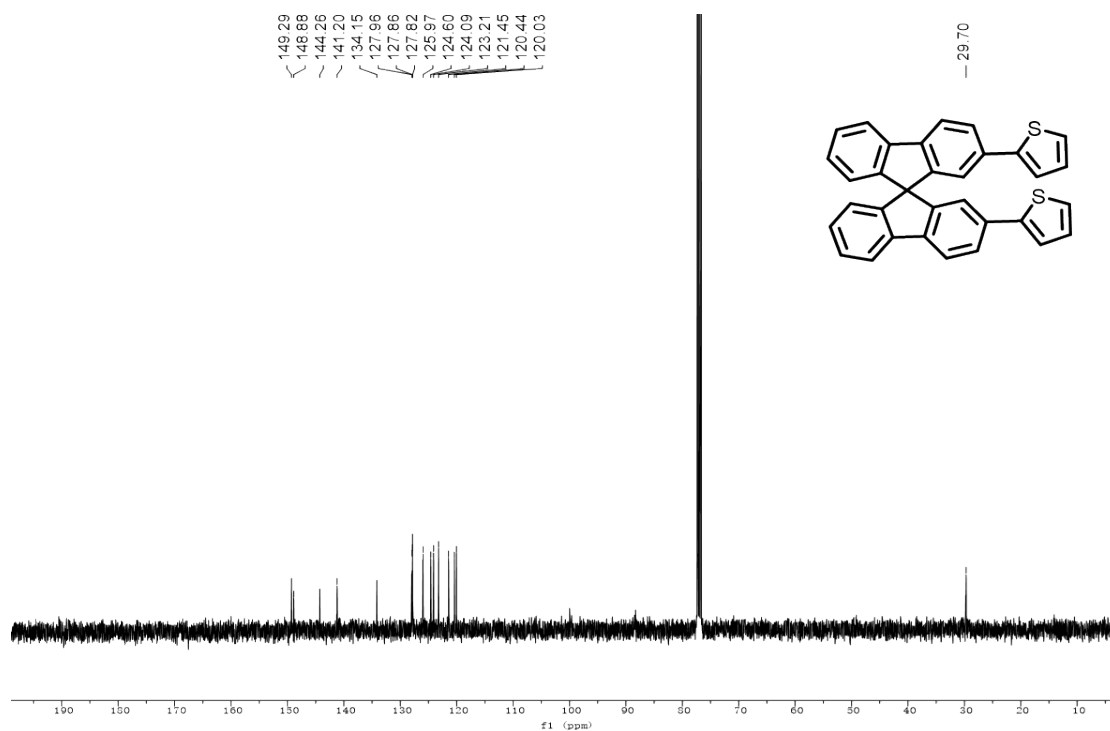

Fig. S29 <sup>13</sup>C NMR (100MHz, CDCl<sub>3</sub>) spectrum of B<sub>2</sub>.

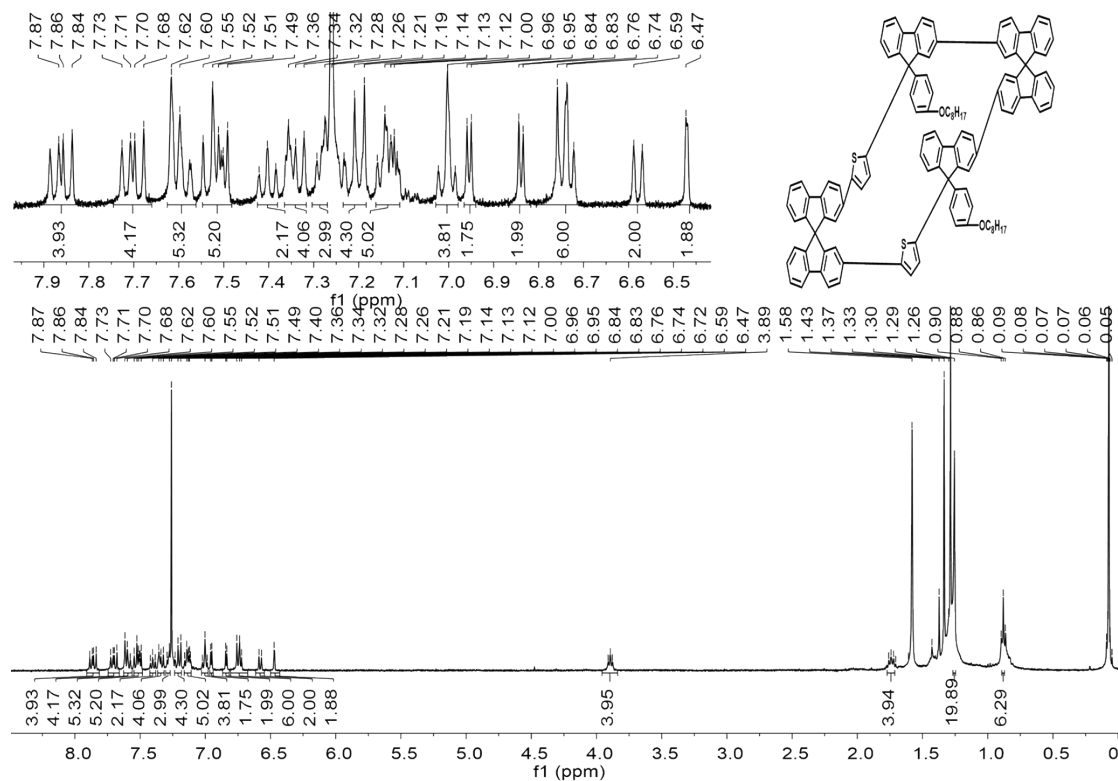

Fig. S30 <sup>1</sup>H NMR (400MHz, CDCl<sub>3</sub>) spectrum of DGs-2.

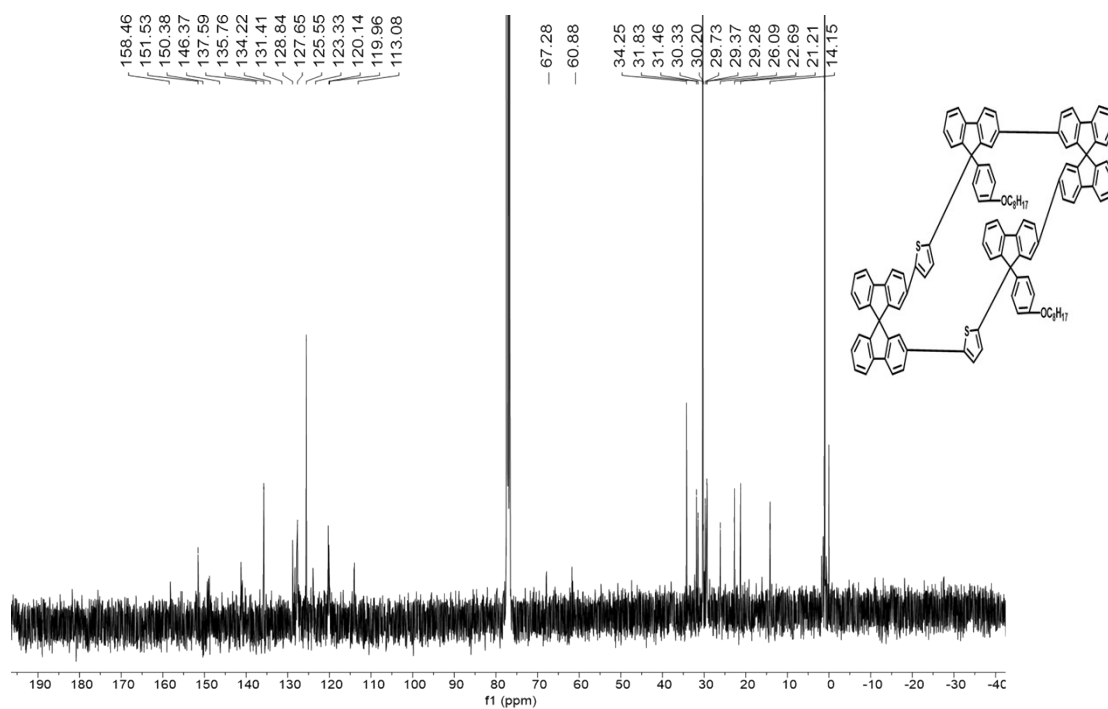

Fig. S31  $^{13}\text{C}$  NMR (100MHz,  $\text{CDCl}_3$ ) spectrum of DGs-2.

## 7. MALDI-TOF-MS of compounds.

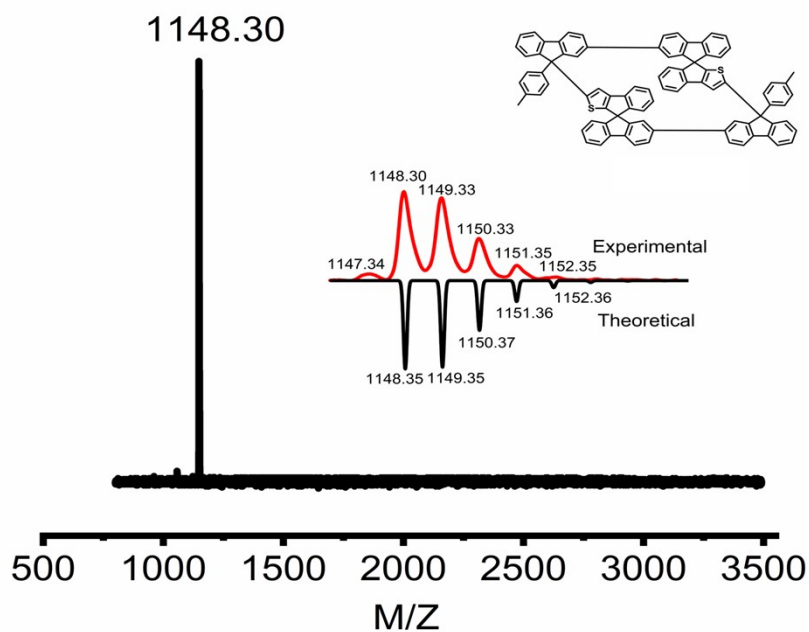

Fi

g. S32 The MALDI-TOF spectrum of DGs-1a.

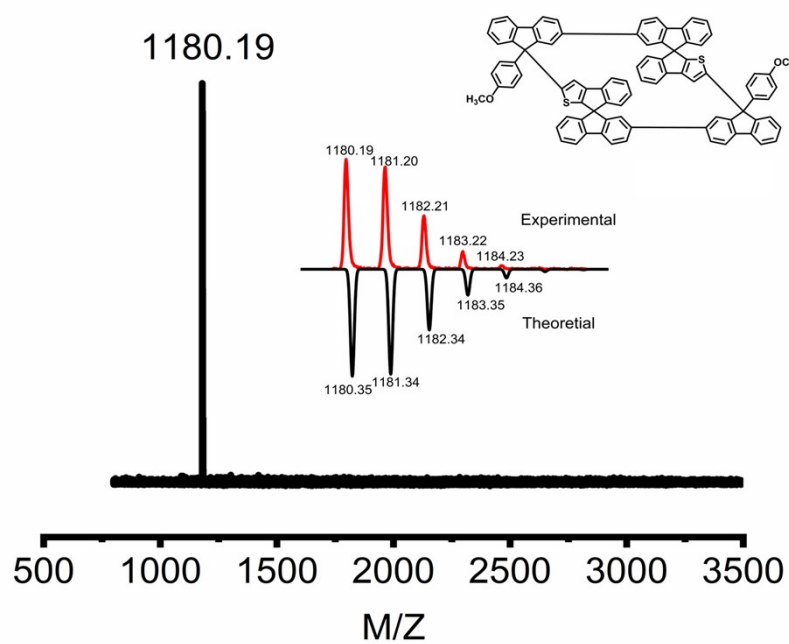

Fig. S33 The MALDI-TOF spectrum of DGs-1b.

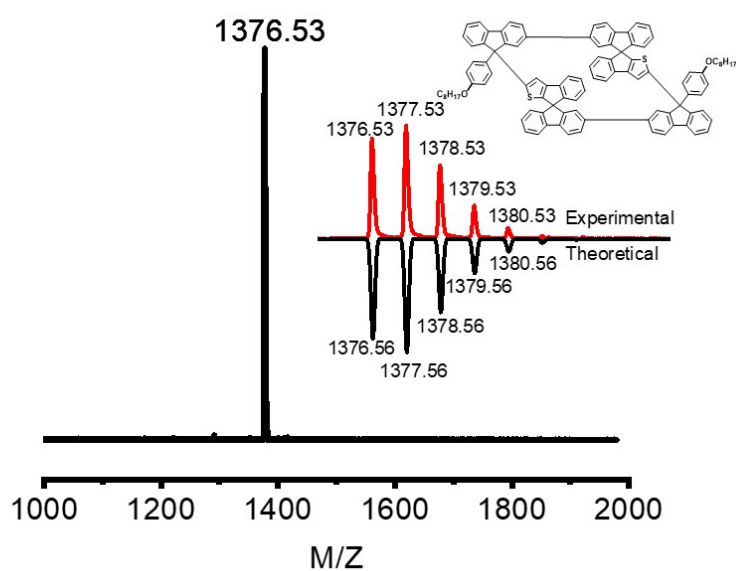

Fig. S34 The MALDI-TOF spectrum of DGs-1c.

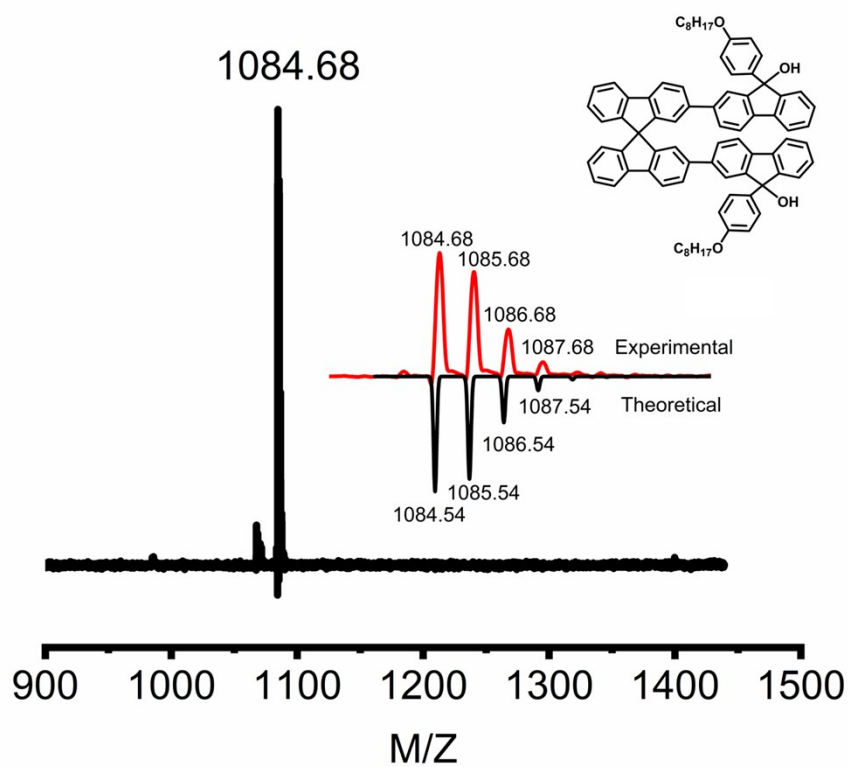

Fig. S35 The MALDI-TOF spectrum of A<sub>2</sub>.

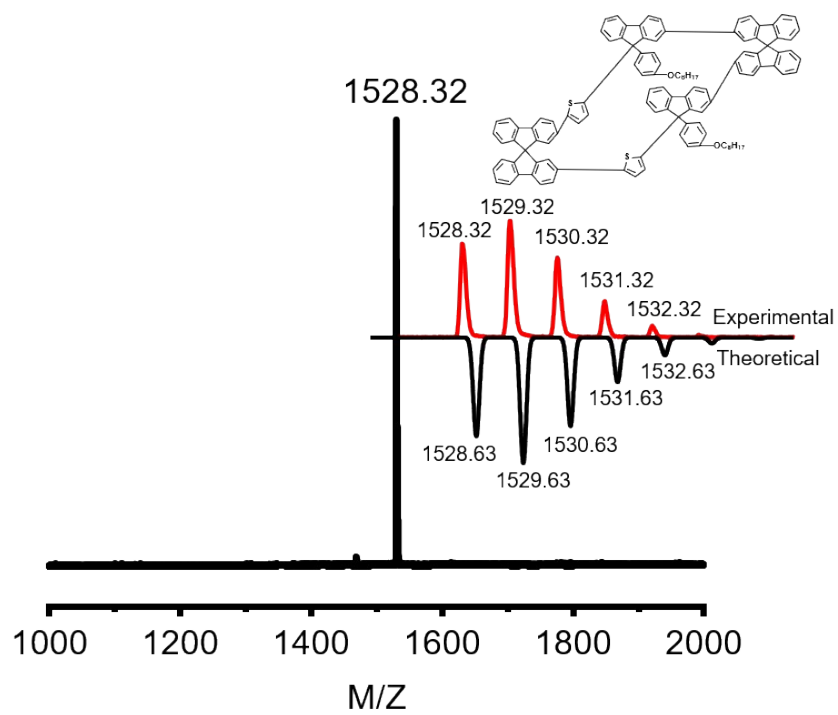

Fig. S36 The MALDI-TOF spectrum of DGs-2.
